# Supplementary material for: AlphaFold2 has more to learn about protein energy landscapes
Source: PubMed Central journal article supplement (PMC10760193; doi:10.1101/2023.12.12.571380), 2023-12-13
Supplement: media-1.pdf [file media-1.pdf]

## Supplementary Information for

### **AlphaFold2 has more to learn about protein energy landscapes**

Devlina Chakravarty<sup>1</sup>, Joseph W. Schafer<sup>1</sup>, Ethan A. Chen<sup>1</sup>, Joseph R. Thole<sup>1,2</sup>, and  
Lauren L. Porter<sup>1,2,\*</sup>

<sup>1</sup>National Center for Biotechnology Information, National Library of Medicine, National  
Institutes of Health, Bethesda, MD 20894

<sup>2</sup>Biochemistry and Biophysics Center, National Heart, Lung, and Blood Institute, National  
Institutes of Health, Bethesda, MD, 20892

\*Correspondence: [porterll@nih.gov](mailto:porterll@nih.gov)

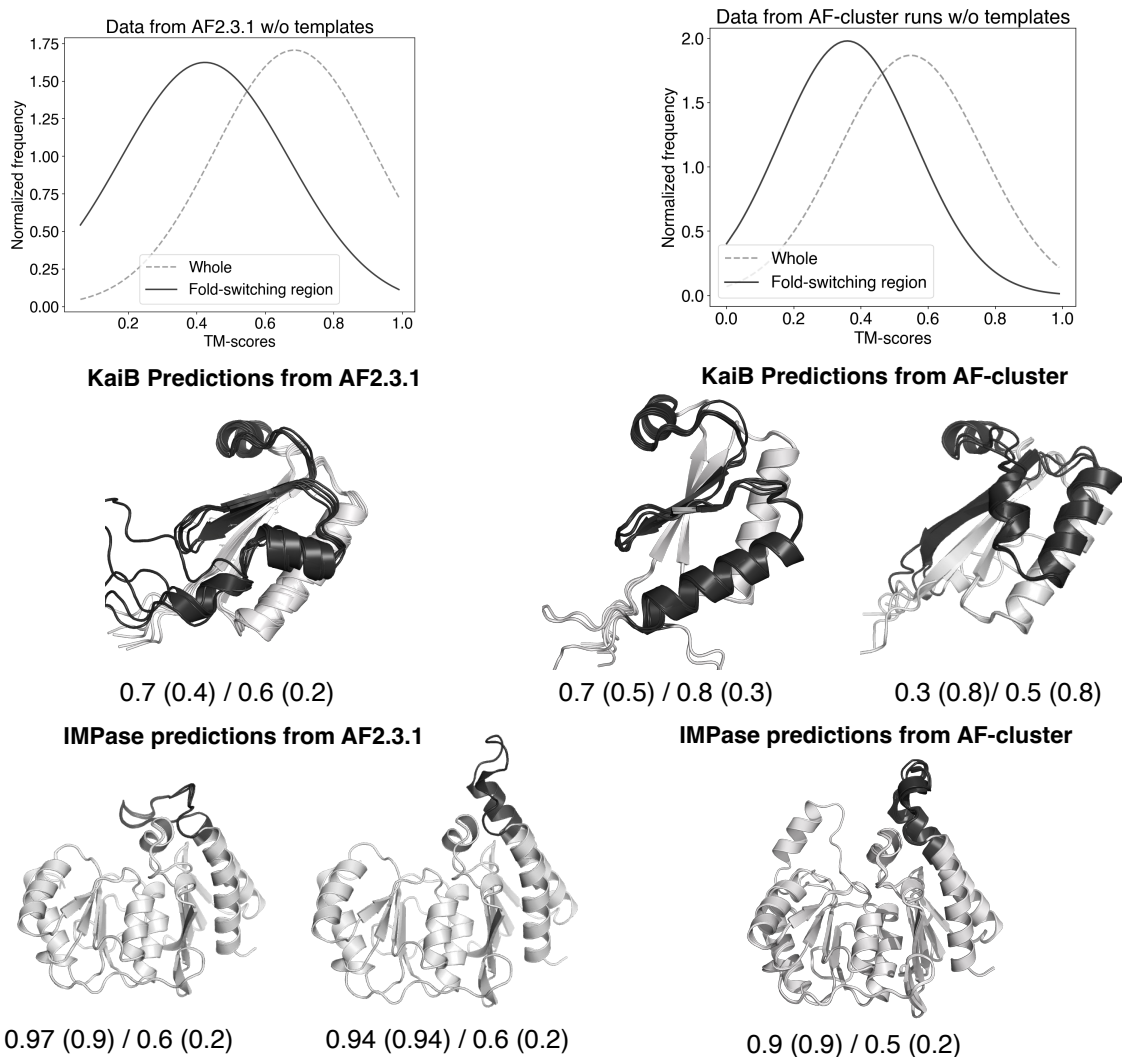

**Figure S1. TM-scores for fold-switching regions represent predictions of fold switchers more accurately than TM-scores of whole proteins.** Distributions of overall vs fold-switching region TM-scores for AF2.3.1 (upper left) and AF-cluster (upper right) demonstrate that whole-protein TM-scores overestimate prediction accuracies corresponding to regions of interest. Examples of predictions from AF2.3.1 and AF-clusters for KaiB and IMPase further demonstrate this point (fold-switching region is highlighted in black and the rest is grey). TM-scores relative to Fold 1 (left of /) and Fold 2 (right of /) are systematically higher for whole proteins (numbers without parentheses) compared to their fold-switching regions (in parentheses).

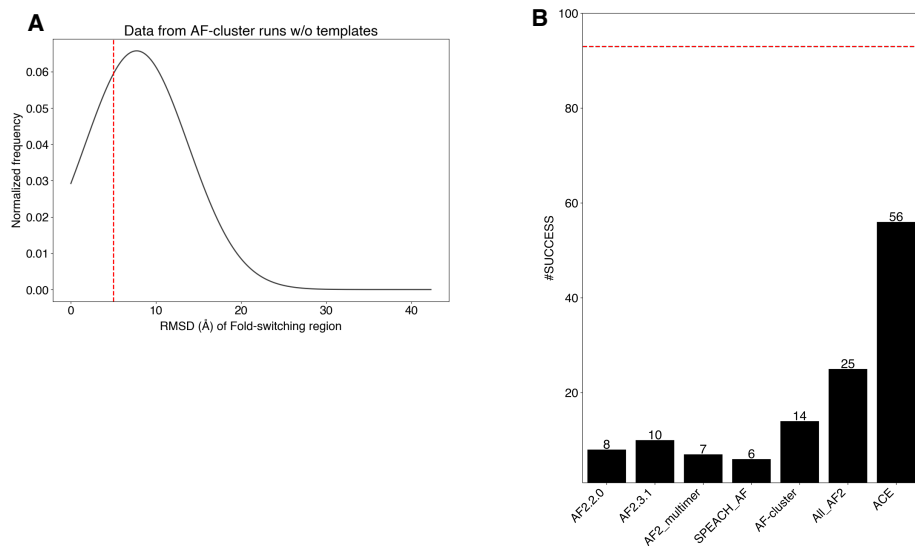

**Figure S2. Assessing predictions by RMSD yields results similar to TM-score based assessments.** Distribution of RMSD for the fold-switching region of AF-cluster predictions referenced against the fold-switching regions of the most similar experimentally determined structure is presented on the left panel (A), with threshold line at 5 Å. Prediction success measured by RMSD (B, fold-switching RMSD within 5 Å of experiment) yields results similar to TM-score (Figure 1 in main text).

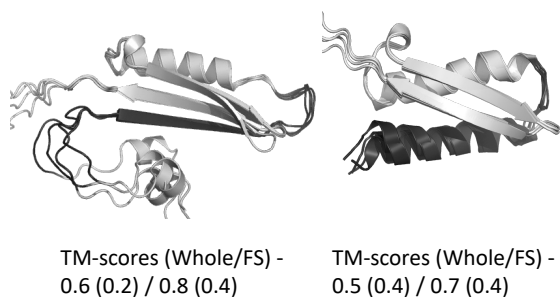

**Figure S3. AlphaFold2 is likely overtrained on some structures.** For example, Fold1 (PDBID: 2kxo) of MinE is predicted by inputting the full length MSA with templates into AF2.3.1, whereas Fold2 (PDBID:3r9j) is predicted by all models by inputting a single sequence (the sequence of MinE) with no templates. TM-scores relative to Whole/Fold-switching region (FS, black) are shown for full protein relative to experimentally determined structures (TM-scores relative to less similar fold in parentheses). Regions of the protein that don't switch folds are light gray.

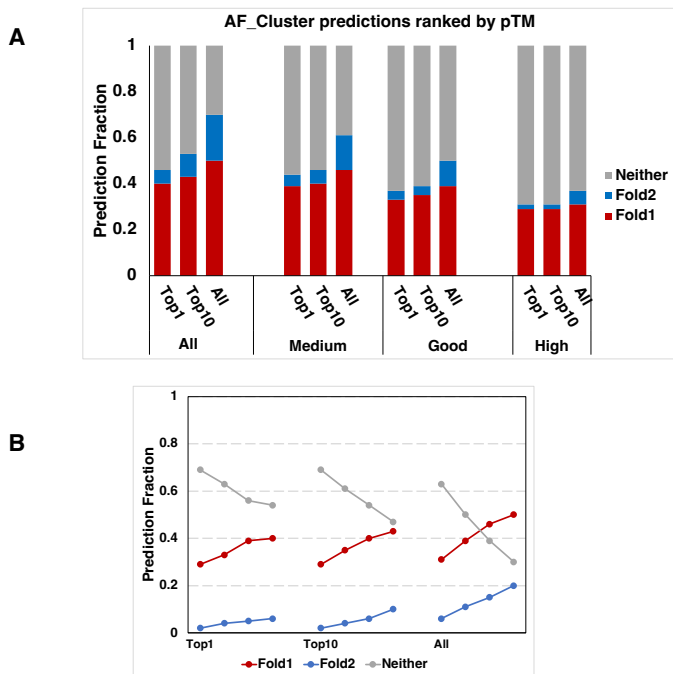

**Figure S4. Ranking by predicted template modeling (pTM) score selects against experimentally observed conformations in favor of experimentally unobserved for AF-cluster predictions.** (A) Bar-plot representation of the Prediction Fraction in Top1, Top10 and All ranked models. (B) Trendline plots showing the change in prediction success in categories –High (pTM>0.9), Good (pTM>0.7), Medium (pTM > 0.6), and All, respectively for Top1, Top10 and All predictions. Neither denotes predictions whose fold-switching regions had TM-scores < 0.6 relative to the experimentally determined structures of both Fold1 and Fold2.

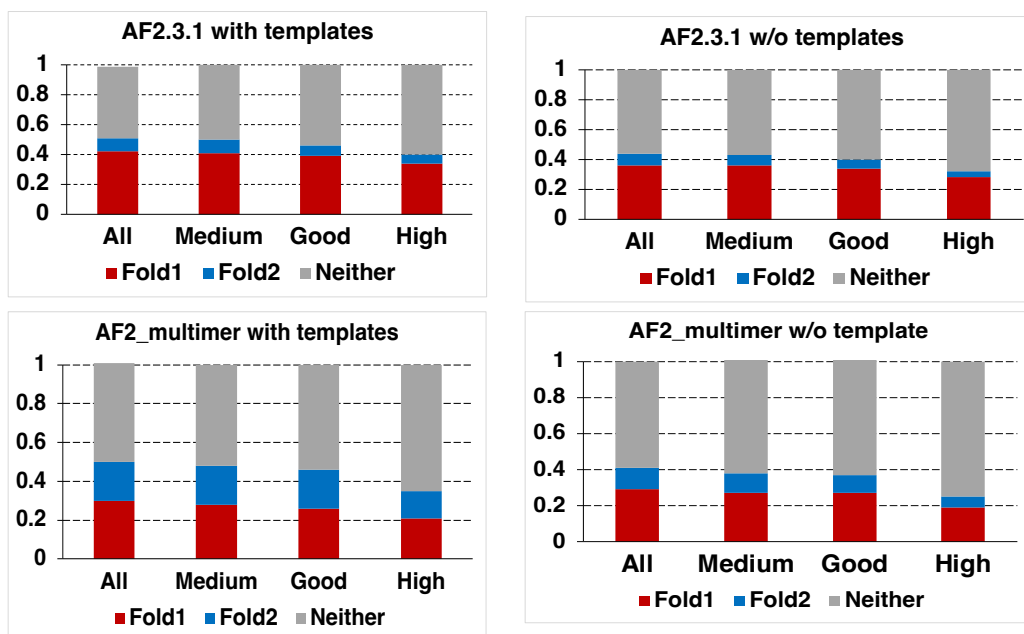

**Figure S5. pLDDT scores select against experimentally determined conformations of fold-switching regions in all AF2.3.1. runs.** Predictions are ranked by confidence (percentage of residues with pLDDT scores > 70). The categories are defined as - All, Medium (confidence > 70%), Good (confidence > 80%) and High (confidence > 90%). Neither denotes predictions whose fold-switching regions had TM-scores < 0.6 relative to the experimentally determined structures of both Fold1 and Fold2.

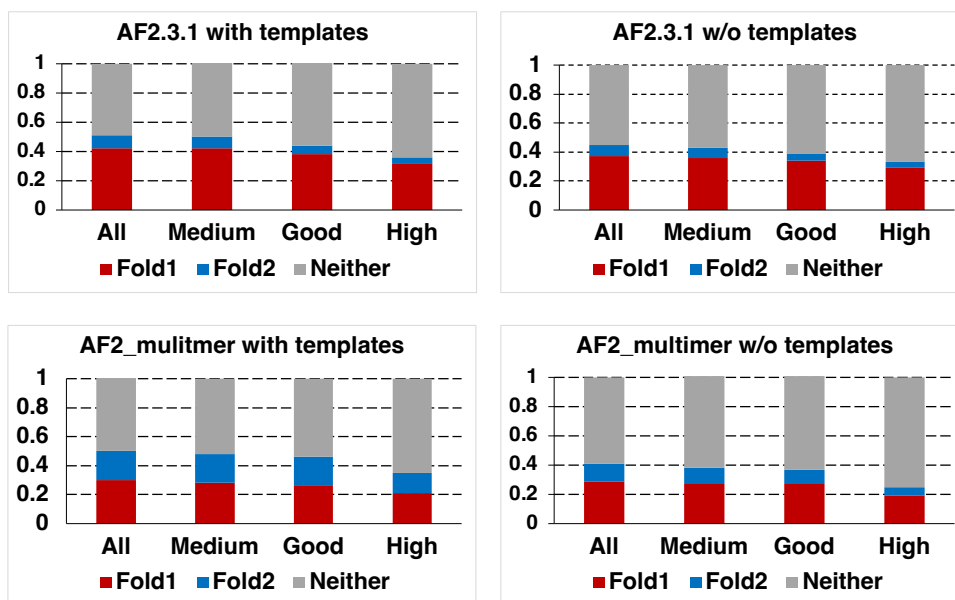

**Figure S6. pTM scores select against experimentally determined conformations of fold-switching regions in all AF2.3.1. runs.** Predictions are ranked by confidence (pTM score defined as - All, Medium (pTM  $\geq 0.6$ ), Good (pTM  $\geq 0.7$ ) and High (pTM  $\geq 0.8$ ). Neither denotes predictions whose fold-switching regions had TM-scores  $< 0.6$  relative to the experimentally determined structures of both Fold1 and Fold2.

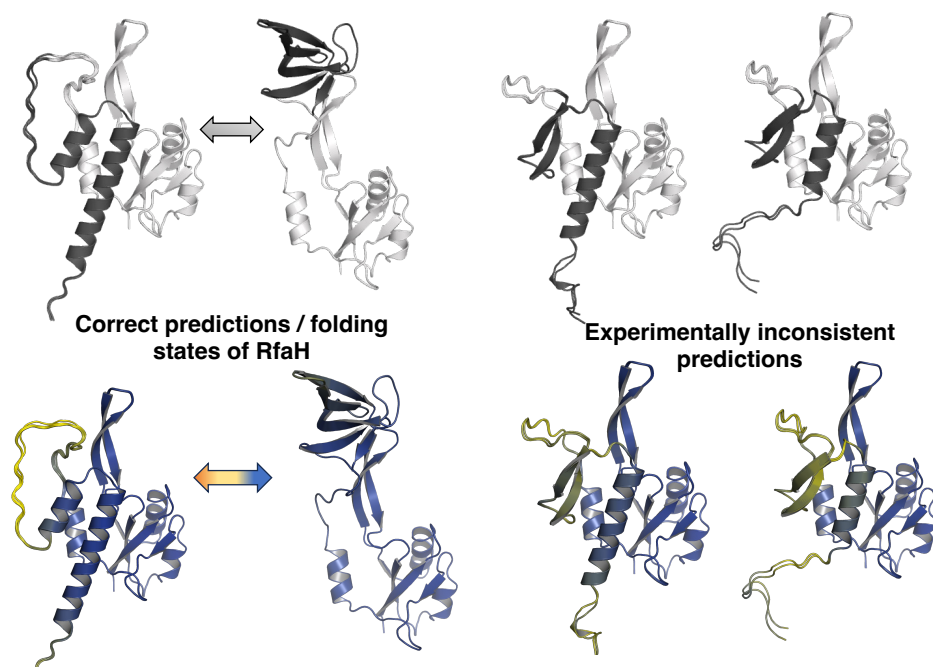

**Figure S7. AF2 predicts experimentally inconsistent conformations of RfaH.** Models corresponding to experimentally determined structures on left; experimentally inconsistent predictions shown on right. The figures below are colored by pLDDT scores, (color ranging from orange, yellow to blue, corresponding to pLDDT scores from 0 to 100). All predictions were generated from AF2\_multimer (run without partner and no templates).



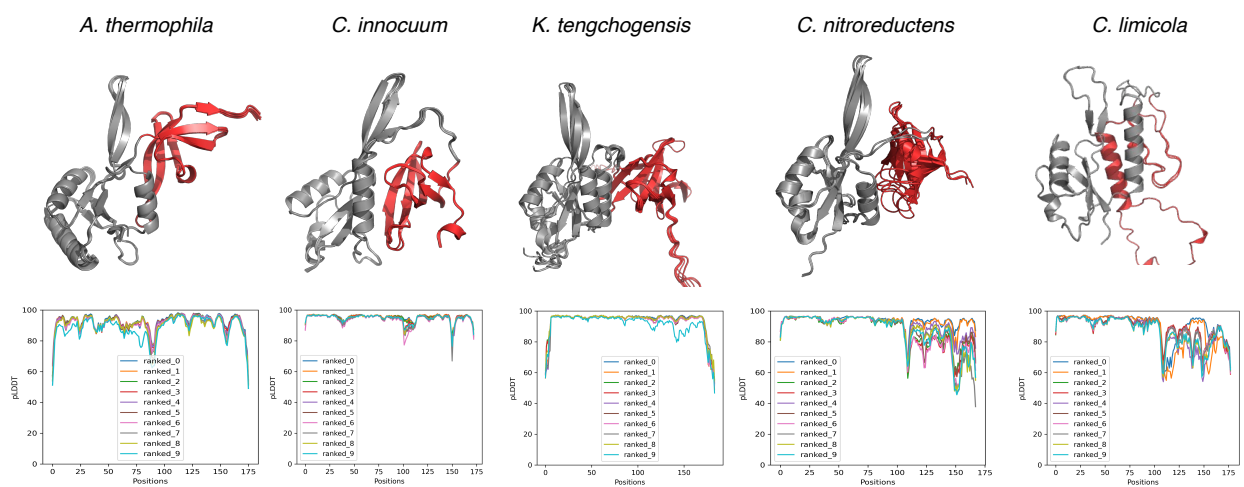

**Figure S8.** AlphaFold2.3.1 fails to predict the experimentally confirmed helical conformations in the C-terminal domains (CTDs) of 4/5 RfaH homologs. In all variants but *C. limicola*, only  $\beta$ -sheet CTDs (red) are predicted. Structurally conserved N-terminal domains are colored gray. pLDDT scores of all 10 models of each protein generated without templates are shown below their predicted structures. C-terminal domains comprise residues 115-end of protein.

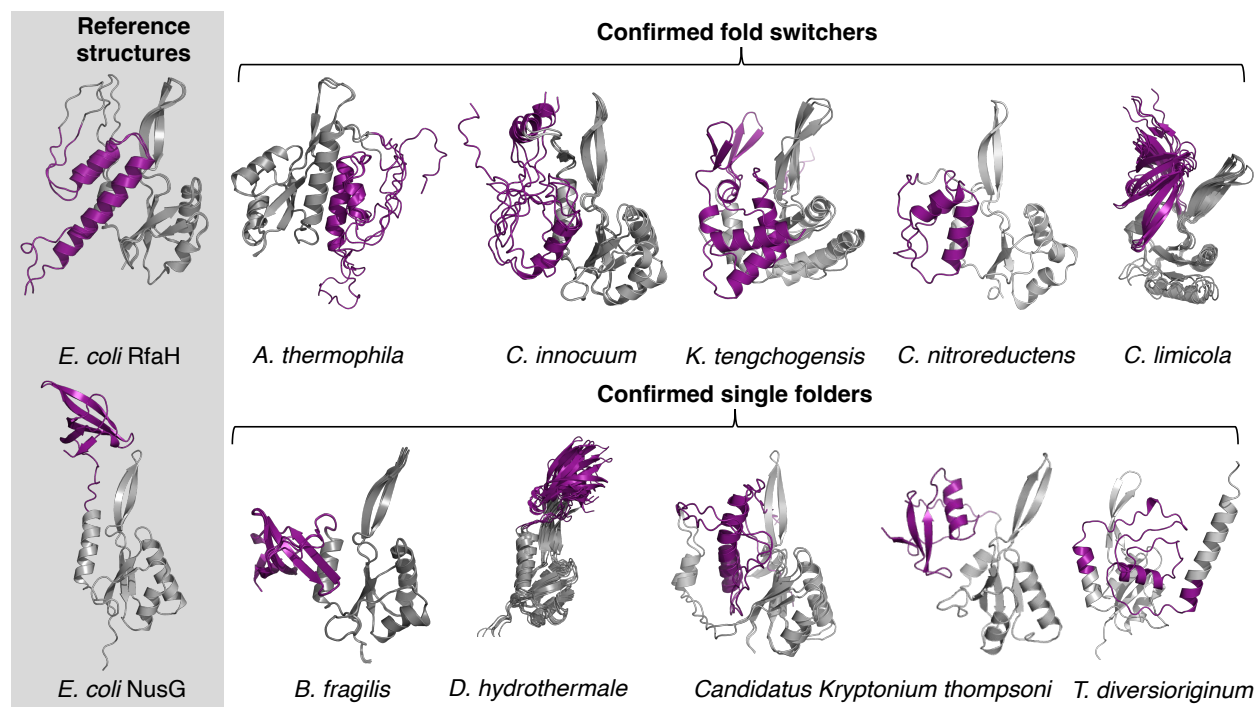

**Figure S9. AF-cluster predictions cannot distinguish between RfaH homologs with helical C-terminal domains (CTDs, upper row) and  $\beta$ -sheet C-terminal domains (lower row).** Further, pLDDT scores of all helical CTD predictions are low (average  $\leq 50$ ), further indicating that correct and incorrect predictions cannot be distinguished. All CTDs are colored purple; structurally conserved N-terminal domains are gray. Experimentally confirmed reference structures of *E. coli* RfaH and NusG are shown on the left column with the same color scheme.

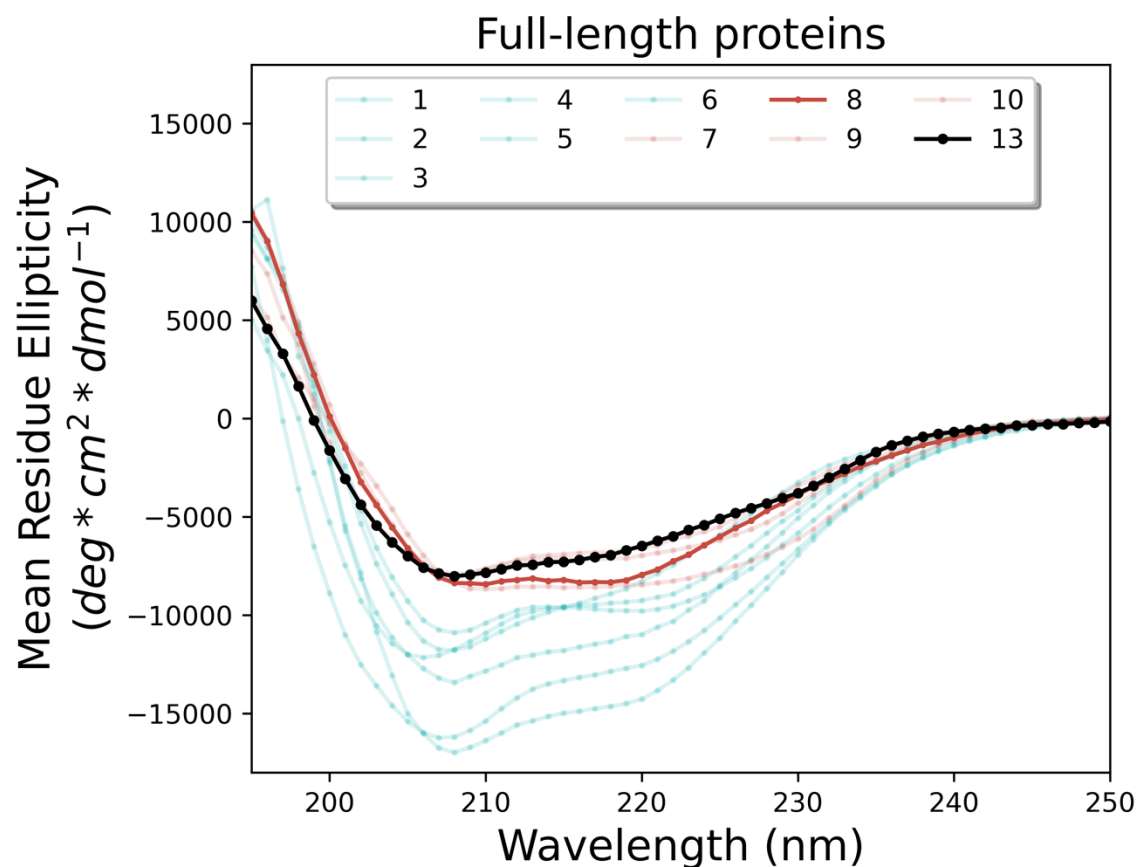

**Figure S10.** The circular dichroism spectrum of NusG Variant 13 (black) resembles single-folding NusGs with ground state  $\beta$ -sheet folds (red) rather than fold-switching NusGs with ground state  $\alpha$ -helical folds (teal). CD spectra of all variants except for 13 were taken from reference 24 in the main text. AF-cluster predicted that it and Variant 8 (bold red) can assume helical folds, inconsistent with experimental evidence. The sequence of Variant 13 (Table S4) inserted into a pET-28a(+) vector was purchased through BioBasic, codon optimized for *E. coli*. Variant 13 was purified using Cytiva Hi-TRAP columns on an ÄKTA Pure at room temperature. Its 6x-His tag was cleaved overnight with biotinylated thrombin (Sigma Millipore) at 4°C while dialyzing in 100 mM potassium phosphate, 10% glycerol (v/v) pH 7.4 using a ThermoFisher dialysis cassette (10 kDa MWCO). The cleaved sample was again run on a Hi-TRAP column, and the unbound flow-through was then concentrated in a Millipore centrifugal concentrator (10 kDa MWCO) and subsequently polished through size exclusion chromatography with a Superdex 70 Increase 10/300 column (Cytiva) and was found to be monomeric. Its CD spectrum was collected on a Chirascan spectrometer (Advanced Photophysics) in 100 mM Phosphate, pH 7.6 at 9  $\mu\text{M}$ .

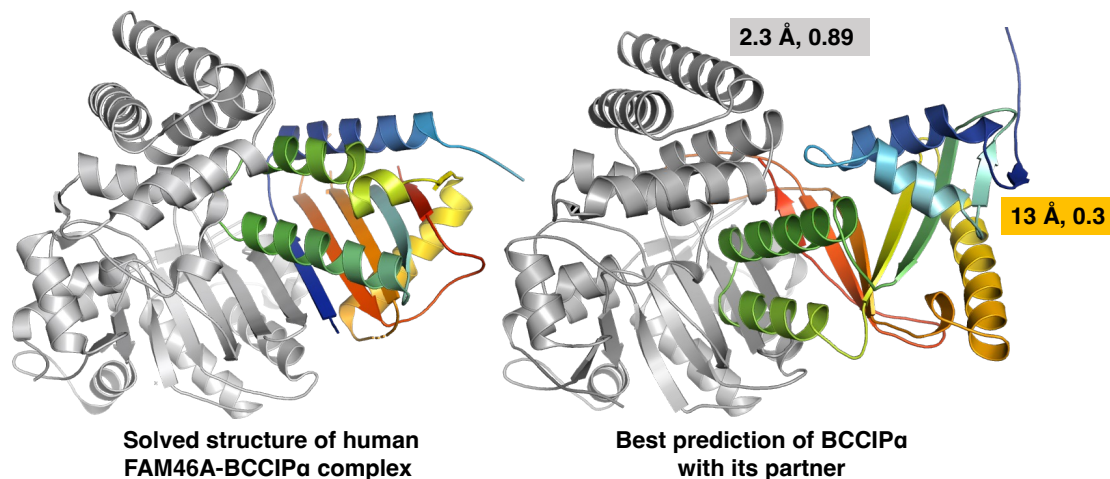

**Figure S11. Predicting the structure of BCCIP $\alpha$  with its binding partner using AF2\_multimer generated the incorrect BCCIP $\beta$  conformation for all models.** Structure of the experimentally determined complex (PDB ID: 8EXF, left) differs from all AF2\_multimer models (Ranked 1 shown). The structure of BCCIP $\alpha$ 's binding partner, FAM46A (gray), was predicted with has high accuracy: TM-score 0.89 and RMSD 2.3 Å. Whereas BCCIP $\alpha$  (rainbow N->C, blue->red) was poorly predicted: TM-score 0.3 and RMSD 13 Å. The predicted binding interface is also incorrect.
